# Supplementary material
Source: PubMed Central journal article supplement (PMC6681824)
Supplement: NIHMS1035986-supplement-SI.pdf [file NIHMS1035986-supplement-SI.pdf]

# **A Transition-State Perspective on Y-Family DNA Polymerase $\eta$ Fidelity in Comparison with X-Family DNA Polymerases $\lambda$ and $\beta$**

Keriann Oertell<sup>1</sup>, Jan Florián<sup>2</sup>, Pouya Haratipour<sup>3</sup>, Debbie C. Crans<sup>4</sup>, Boris A. Kashemirov<sup>3</sup>, Samuel H. Wilson<sup>5</sup>, Charles E. McKenna<sup>3</sup>, and Myron F. Goodman<sup>\*1,3</sup>

<sup>1</sup>Department of Biological Sciences, Dana and David Dornsife College of Letters, Arts, and Sciences, University of Southern California, University Park Campus, Los Angeles, CA 90089

<sup>2</sup>Department of Chemistry and Biochemistry, Loyola University Chicago, 1032 W. Sheridan Road, Chicago, IL 60660

<sup>3</sup>Department of Chemistry, Dana and David Dornsife College of Letters, Arts, and Sciences, University of Southern California, University Park Campus, Los Angeles, CA 90089

<sup>4</sup>Department of Chemistry, Colorado State University, Fort Collins, CO 80523

<sup>5</sup>Genome Integrity and Structural Biology Laboratory, National Institute of Environmental Health Sciences, National Institutes of Health, Research Triangle, NC 27709

**Supporting Information**

## Synthesis of $\beta,\gamma$ -NH of dNTP analogues

**General Method 1:** The tetrasodium salt of imidodiphosphoric acid (2 equiv) was dissolved in cold water and converted to the tetraacid by passage through DOWEX H<sup>+</sup>. An excess of TEA was added and the solution was concentrated under vacuum to obtain the tris(triethylammonium) salt. The residue was co-evaporated with anhydrous DMF (3 x 1 mL), dissolved in dry acetonitrile and cooled to 0°C in an ice-bath. In another flask, 5'-dNMP (5'-dAMP free acid, 5'-dGMP as disodium salt) (1 equiv) was dissolved in acetonitrile [0.3M] and TEA (12 equiv) and cooled to 0°C. Then, the solution of trifluoroacetic anhydride (TFAA) (15 equiv) in acetonitrile [1.2 M] cooled to 0°C in an ice-bath, then was added drop-wise using a gastight syringe to the 5'-dNMP solution under N<sub>2</sub>. The reaction was stirred for 10 min at room temperature. Excess TFAA was removed under vacuum and the residue was cooled down to 0 °C. Then a cold solution of *N*-methylimidazole (15 equiv) in anhydrous acetonitrile [3 M] and TEA (2.5 equiv) was added dropwise under N<sub>2</sub> at 0 °C. The reaction monitored by <sup>31</sup>P NMR (~ $\delta$  -11.5 ppm, in CD<sub>3</sub>CN). Activated dNMP-*N*-methylimidazolide<sup>1</sup> was added dropwise to the tris(triethylammonium) salt of imidodiphosphoric acid at 0 °C under N<sub>2</sub>. The solution was stirred at rt for 1 h and the reaction monitored to completion by <sup>31</sup>P NMR. The crude material was purified by dual-pass preparative HPLC: Macherey-Nagel Nucleogel SAX 1000-10 25 mm x 15 cm preparative column (8.0 mL/min, 259 nm) using a gradient (A/ H<sub>2</sub>O and B/ 0.5 M triethylammonium bicarbonate pH 8.0 buffer: 0-7.5 min B 0-55%, 7.5-15 min B 55%, 15-20 min B 55-100%, 20-25 min B 100%) and further purified by preparative Phenomenex Luna C18 HPLC column (5  $\mu$ m, 250 mm x 21 mm) (8.0 mL/min, 259 nm; isocratic mode with 6.5% acetonitrile 0.1 M triethylammonium bicarbonate pH 7.5 buffer).

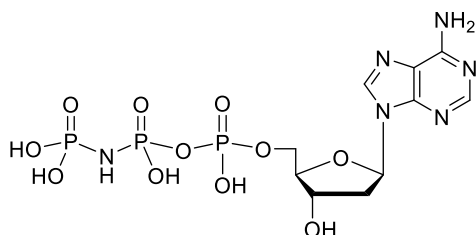

### **((((2S,5S)-5-(6-amino-9H-purin-9-yl)-3-hydroxyoxolan-2-yl)methoxy)(hydroxy)phosphoryl)oxy](hydroxy)phosphoryl)amino)phosphonic acid – NH-dATP**

According to **General Method 1**, the tris(tetraethylammonium) of imidodiphosphoric acid (2 equiv., 34 mg, 0.058 mmol) in anhydrous acetonitrile was reacted with dAMP-*N*-methylimidazolide (1 equiv., 0.029 mmol) for 1 h and purified by HPLC to obtain bis(triethylammonium) salt of the title compound (14.1 mg, 70% yield). <sup>1</sup>H NMR (500 MHz, D<sub>2</sub>O, pH=10):  $\delta$  8.37 (s, 1H), 8.12 (d, *J* = 0.7 Hz, 1H), 6.39 (t, *J* = 6.8 Hz, 1H), 4.16 (td, *J* = 3.6, 1.3 Hz, 1H), 4.07 (m, 2H), 2.70 (dt, *J* = 13.6, 6.6 Hz, 1H), 2.47 (ddd, *J* = 13.8, 6.4, 4.1 Hz, 1H); <sup>31</sup>P NMR (202 MHz, D<sub>2</sub>O, pH=10):  $\delta$  -0.81

<sup>1</sup> Mohamady S, Jakeman DL. An improved method for the synthesis of nucleoside triphosphate analogues. *The Journal of organic chemistry*. **2005** Dec 9;70(25):10588-91.

(d,  $J = 4.5$  Hz), -7.69 (dd,  $J = 21.0, 4.5$  Hz), -10.65 (d,  $J = 21.3$  Hz). HRMS (ESI):  $[M-H]^-$ ,  $m/z$  calcd for  $C_{10}H_{15}N_6O_{11}P_3^-$  489.0095; found 489.0095.

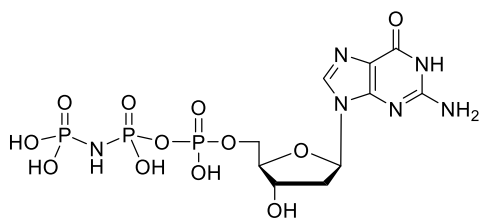

**{{[(((2R,5R)-5-(2-amino-6-oxo-6,9-dihydro-1H-purin-9-yl)-3-hydroxyoxolan-2-yl)methoxy}(hydroxy)phosphoryl)oxy](hydroxy)phosphoryl)amino}phosphonic acid – NH-dGTP**

According to **General Method 1**, the tris(tetraethylammonium) of imidodiphosphoric acid (2 equiv., 34 mg, 0.058 mmol) in anhydrous acetonitrile was reacted with dGMP-N-methylimidazolide (1 equiv., 0.029 mmol) for 1 h and purified by HPLC to obtain bis(triethylammonium) salt of the title compound (13.5 mg, 66% yield).  $^1H$  NMR (500 MHz,  $D_2O$ , pH=10):  $\delta$  7.96 (s, 1H), 6.19 (t,  $J = 6.9$  Hz, 1H), 4.13 (q,  $J = 4.0$  Hz, 1H), 4.06 (m, 2H), 2.70 (dt,  $J = 13.9, 6.8$  Hz, 1H), 2.37 (ddd,  $J = 14.0, 6.4, 3.8$  Hz, 1H).  $^{31}P$  NMR (202 MHz,  $D_2O$ , pH=10):  $\delta$  -1.28 (d,  $J = 4.1$  Hz), -8.23 (d,  $J = 21.7$  Hz), -10.89 (d,  $J = 21.6$  Hz). MS (ESI):  $[M-H]^-$ ,  $m/z$  calcd for  $C_{10}H_{16}N_6O_{12}P_3^-$  505.00; found 505.07.

**Figure S1.  $^1H$  NMR (500 MHz,  $D_2O$ , pH 10.0) of  $\beta,\gamma$ -NH dATP**

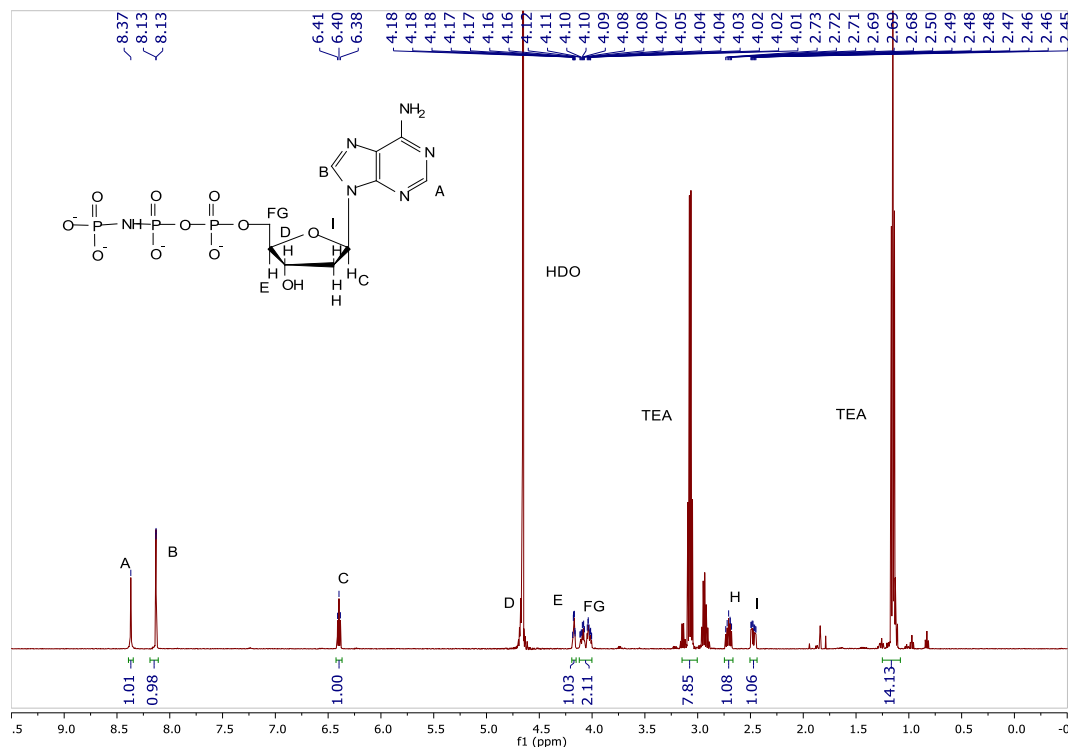

Figure S2. COSY (500 MHz, D<sub>2</sub>O, pH=10) of β,γ-NH dATP

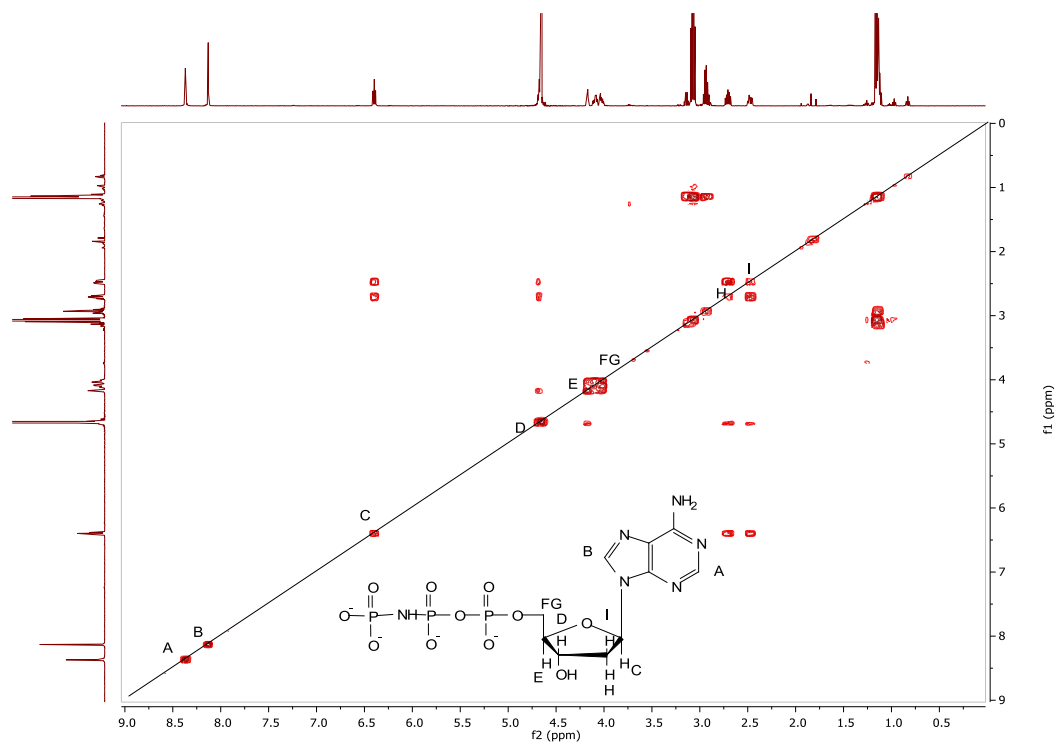

Figure S3. <sup>31</sup>P NMR (202 MHz, D<sub>2</sub>O, pH 10.0) of β,γ-NH dATP

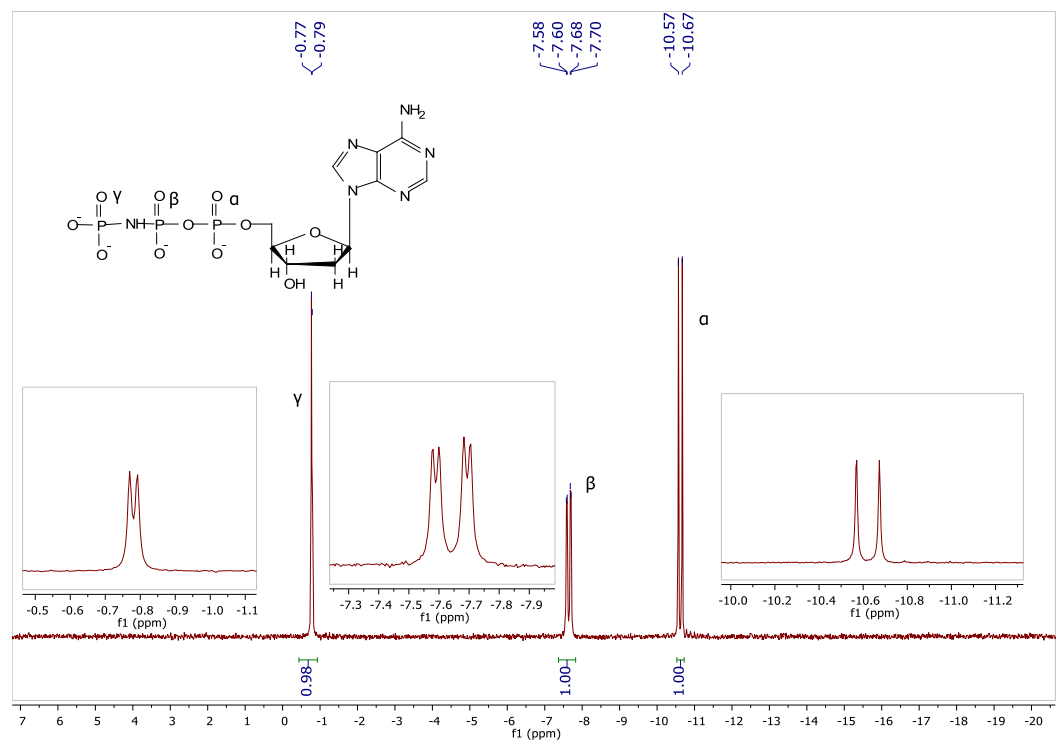

Figure S4. HRMS (ESI) [M - H]<sup>-</sup> of β,γ-NH dATP

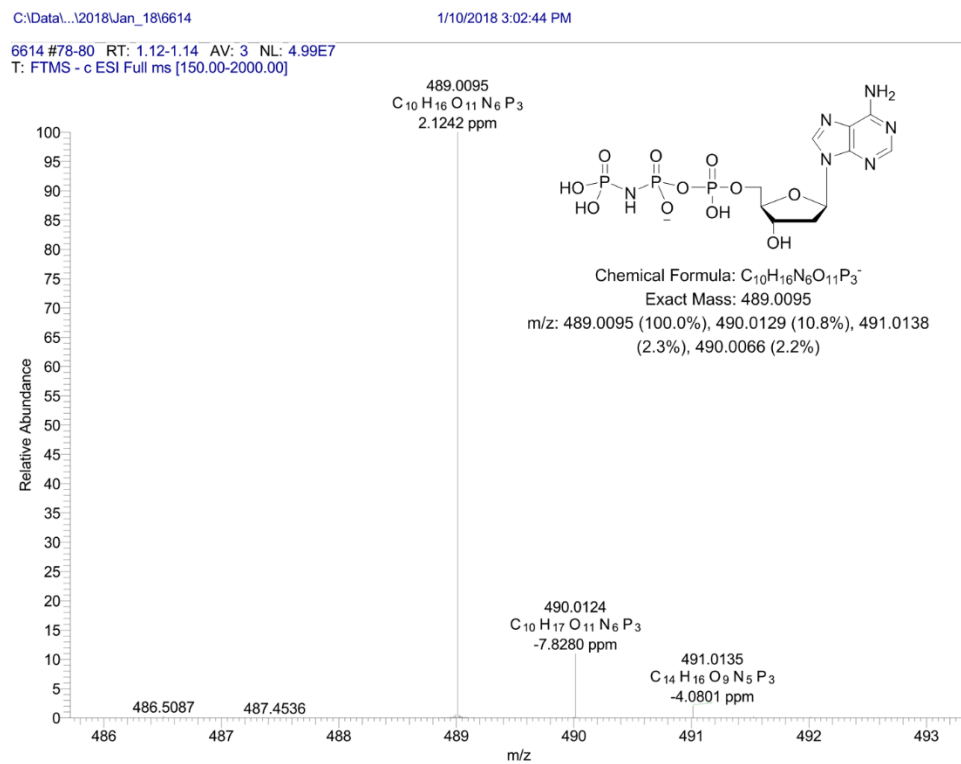

Figure S5. <sup>1</sup>H NMR (500 MHz, D<sub>2</sub>O, pH 10.0) of β,γ-NH dGTP

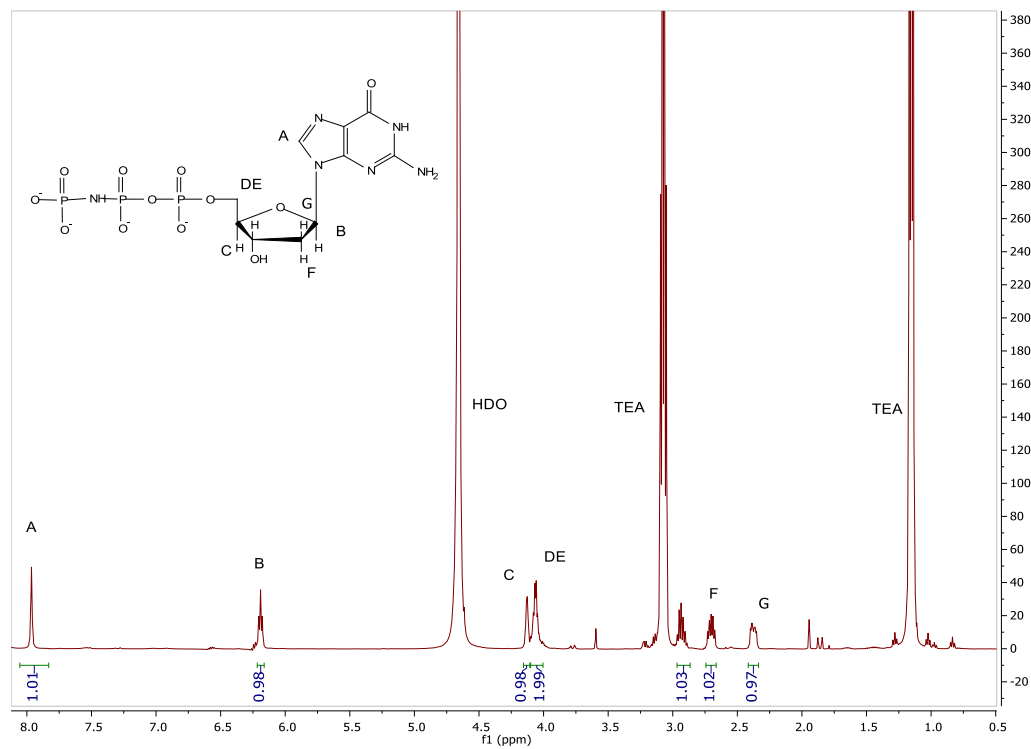

Figure S6. COSY (500 MHz, D<sub>2</sub>O, pH=10) of  $\beta,\gamma$ -NH dGTP

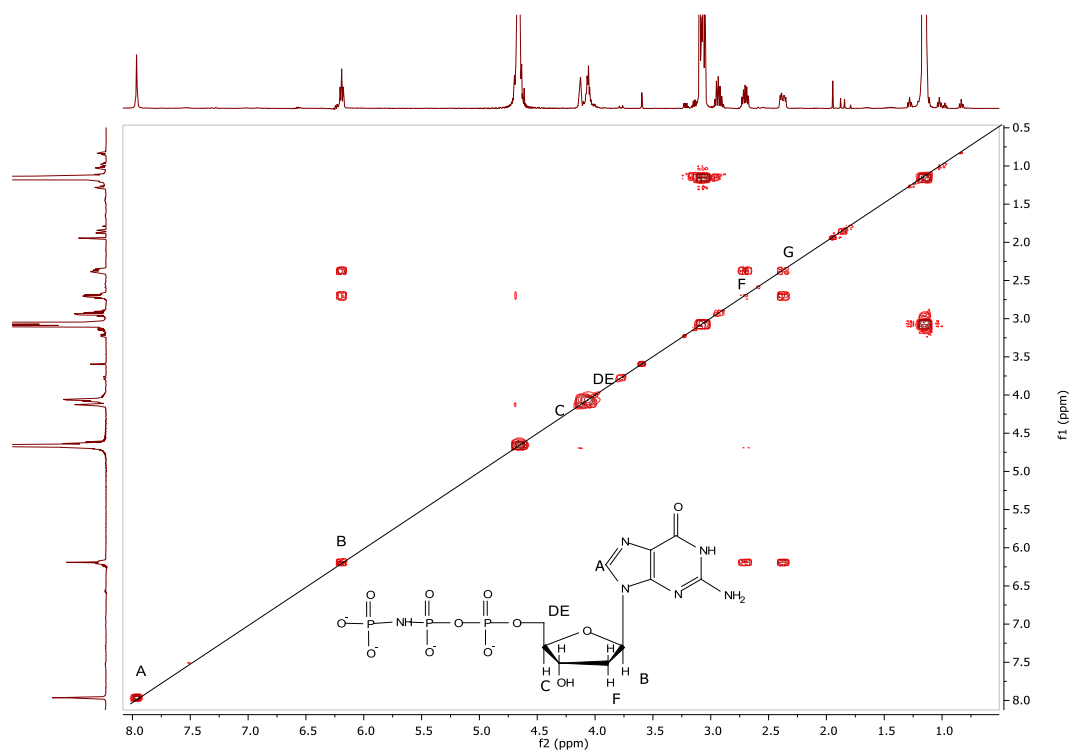

Figure S7. <sup>31</sup>P NMR (202 MHz, D<sub>2</sub>O, pH 10.0) of  $\beta,\gamma$ -NH dGTP

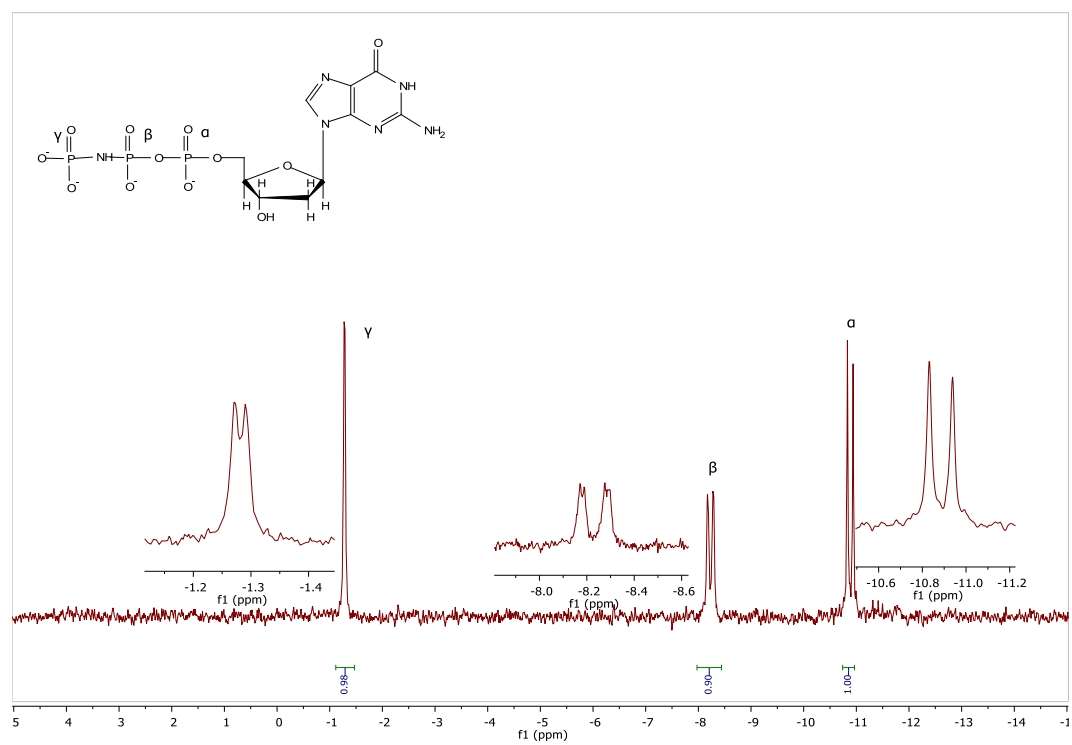

Figure S8. MS (ESI)  $[M - H]^-$  of  $\beta,\gamma$ -NH dGTP

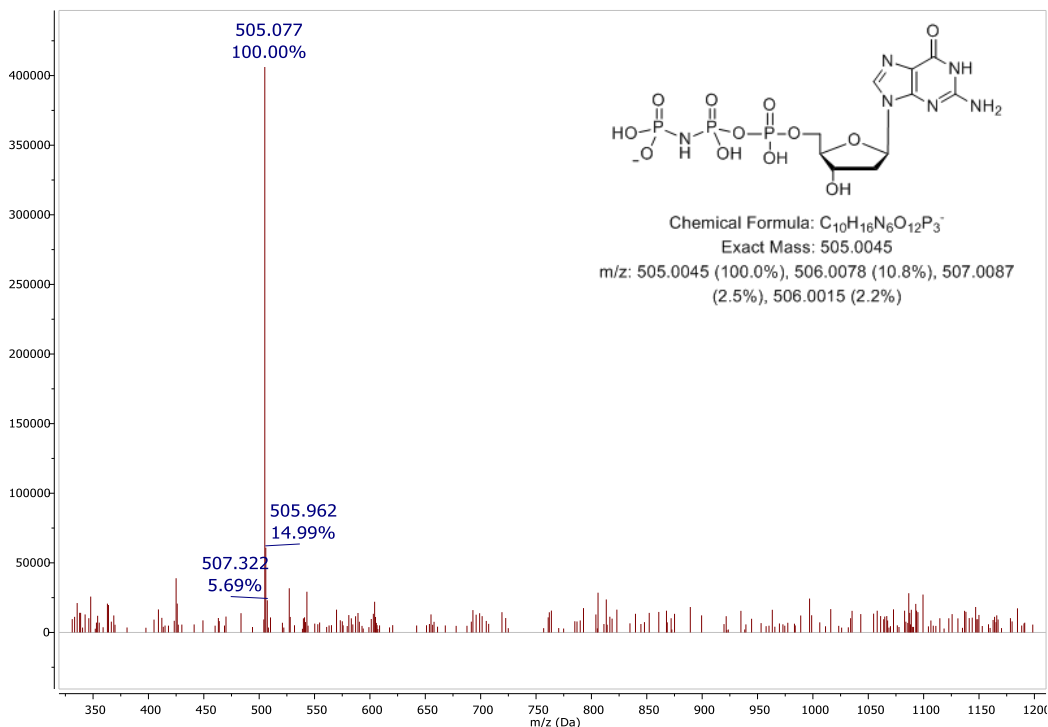

Figure S9. *Hyperquad2008* simulation for titration curve of imidodiphosphoric acid in 0.1 M KCl solution titrated with ~0.1 M KOH in  $CO_2$ -free  $H_2O$  using a Schott Instruments Titrator Basic

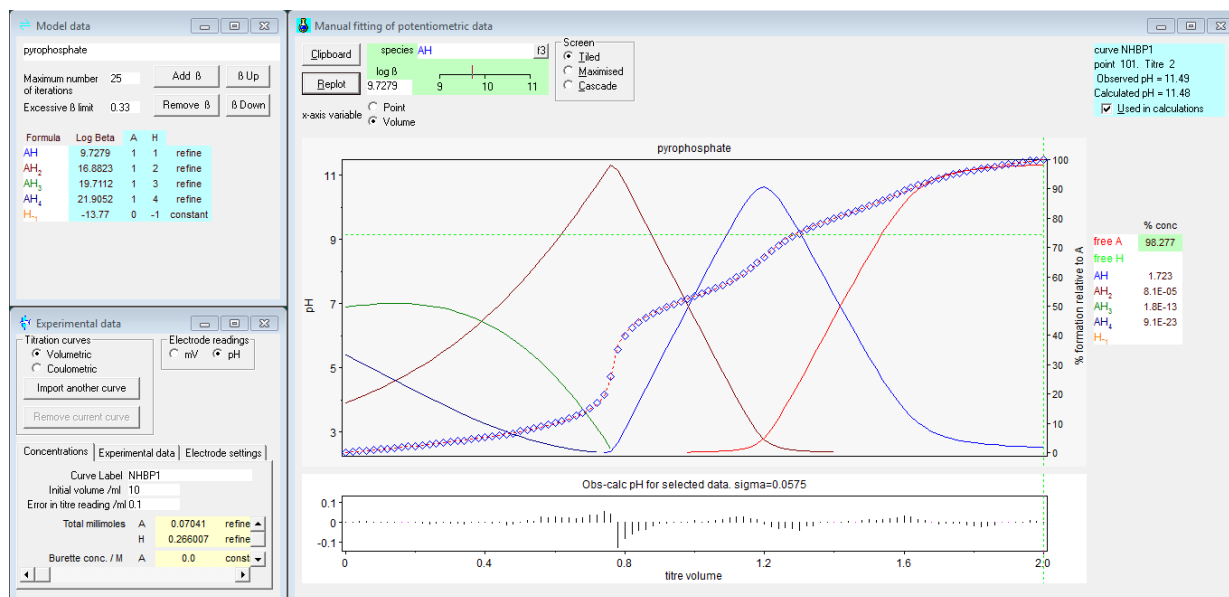

## Kinetic data tables

Table S1. Pol  $\eta$  kinetic data

|                   |                  | A opp. T                            |                     |                                     |                     | G opp. T                            |                     |                                     |                     |
|-------------------|------------------|-------------------------------------|---------------------|-------------------------------------|---------------------|-------------------------------------|---------------------|-------------------------------------|---------------------|
|                   |                  | B Sequence                          |                     | W Sequence                          |                     | B Sequence                          |                     | W Sequence                          |                     |
| -X-               | pK <sub>a4</sub> | k <sub>pol</sub> (s <sup>-1</sup> ) | K <sub>d</sub> (μM) | k <sub>pol</sub> (s <sup>-1</sup> ) | K <sub>d</sub> (μM) | k <sub>pol</sub> (s <sup>-1</sup> ) | K <sub>d</sub> (μM) | k <sub>pol</sub> (s <sup>-1</sup> ) | K <sub>d</sub> (μM) |
| CF <sub>2</sub>   | 7.8              | 0.13 ± 0.02                         | 150 ± 10            | 0.15 ± 0.02                         | 80 ± 50             |                                     |                     | 0.0053 ± 0.008                      | 100 ± 10            |
| CFCI              | 8.4              | 0.034 ± 0.007                       | 560 ± 180           | 0.023 ± 0.001                       | 250 ± 20            |                                     |                     |                                     |                     |
| CCl <sub>2</sub>  | 8.8              | 0.016 ± 0.005                       | 270 ± 10            |                                     |                     |                                     |                     |                                     |                     |
| O                 | 8.9              | 4.1 ± 1.2                           | 9.4 ± 3.1           | 4.7 ± 1.0                           | 7.1 ± 2.1           | 0.21 ± 0.02                         | 30 ± 3              | 0.86 ± 0.02                         | 20 ± 4              |
| CHF (mix)         | 9.0              | 0.23 ± 0.08                         | 190 ± 80            | 0.22 ± 0.03                         | 130 ± 30            | 0.032 ± 0.005                       | 370 ± 60            | 0.12 ± 0.00                         | 390 ± 20            |
| CHF (R)           | 9.0              | 0.24 ± 0.04                         | 170 ± 60            | 0.51 ± 0.07                         | 240 ± 30            |                                     |                     |                                     |                     |
| CHF (S)           | 9.0              | 0.036 ± 0.007                       | 120 ± 30            | 0.076 ± 0.005                       | 160 ± 10            |                                     |                     |                                     |                     |
| CBr <sub>2</sub>  | 9.3              | 0.024 ± 0.003                       | 160 ± 30            | 0.028 ± 0.011                       | 370 ± 220           |                                     |                     |                                     |                     |
| CHCl (mix)        | 9.5              | 0.033 ± 0.08                        | 610 ± 160           | 0.027 ± 0.003                       | 290 ± 70            |                                     |                     |                                     |                     |
| CHCl (R)          | 9.5              | 0.032 ± 0.003                       | 120 ± 70            | 0.025 ± 0.006                       | 110 ± 30            |                                     |                     |                                     |                     |
| CHCl (S)          | 9.5              | 0.016 ± 0.004                       | 290 ± 40            | 0.016 ± 0.003                       | 310 ± 90            |                                     |                     |                                     |                     |
| NH                | 9.7              | 0.27 ± 0.06                         | 4.8 ± 0.6           | 0.35 ± 0.05                         | 3.9 ± 1.1           | 0.012 ± 0.001                       | 36 ± 6              | 0.035 ± 0.003                       | 44 ± 5              |
| CH <sub>2</sub>   | 10.5             | 0.092 ± 0.008                       | 350 ± 22            | 0.11 ± 0.02                         | 270 ± 70            |                                     |                     |                                     |                     |
| CHCH <sub>3</sub> | 11.59            | 0.0016                              | 130                 | 0.0024                              | 62                  |                                     |                     |                                     |                     |



Table S2. Pol  $\lambda$  kinetic parameters.

|                  |                  | A opp. T                            |                           | G opp. T                            |                           |
|------------------|------------------|-------------------------------------|---------------------------|-------------------------------------|---------------------------|
| -X-              | pK <sub>a4</sub> | k <sub>pol</sub> (s <sup>-1</sup> ) | K <sub>d</sub> ( $\mu$ M) | k <sub>pol</sub> (s <sup>-1</sup> ) | K <sub>d</sub> ( $\mu$ M) |
| CF <sub>2</sub>  | 7.8              | 6.7 $\pm$ 0.9                       | 8.1 $\pm$ 1.7             | 0.042 $\pm$ 0.001                   | 68 $\pm$ 5                |
| CFCI (mix)       | 8.4              | 2.3 $\pm$ 0.4                       | 38 $\pm$ 7                | 0.017 $\pm$ 0.002                   | 85 $\pm$ 1                |
| CCl <sub>2</sub> | 8.8              | 0.81 $\pm$ 0.12                     | 18 $\pm$ 4                | 0.0019 $\pm$ 0.0004                 | 49 $\pm$ 25               |
| O                | 8.9              | 2.6 $\pm$ 0.4                       | 1.8 $\pm$ 0.3             | 0.027 $\pm$ 0.003                   | 20 $\pm$ 5                |
| CHF (mix)        | 9.0              | 5.4 $\pm$ 0.5                       | 5.4 $\pm$ 2.0             | 0.040 $\pm$ 0.005                   | 40 $\pm$ 9                |
| CHF (R)          | 9.0              | 6.1 $\pm$ 1.0                       | 4.3 $\pm$ 1.1             | 0.042 $\pm$ 0.002                   | 17 $\pm$ 2                |
| CHF (S)          | 9.0              | 2.0 $\pm$ 0.3                       | 4.6 $\pm$ 0.4             | 0.012 $\pm$ 0.002                   | 71 $\pm$ 9                |
| CHCl (mix)       | 9.5              | 2.5 $\pm$ 0.4                       | 4.1 $\pm$ 0.4             | 0.025 $\pm$ 0.001                   | 38 $\pm$ 4                |
| CH <sub>2</sub>  | 10.5             | 0.38 $\pm$ 0.05                     | 1.2 $\pm$ 0.2             | 0.0046 $\pm$ 0.0006                 | 18 $\pm$ 5                |

Table S3. Pol  $\beta$  kinetic parameters.

| -X-                              | pK <sub>a4</sub> | A opp. T                            |                           | G opp. T                            |                           |
|----------------------------------|------------------|-------------------------------------|---------------------------|-------------------------------------|---------------------------|
|                                  |                  | k <sub>pol</sub> (s <sup>-1</sup> ) | K <sub>d</sub> ( $\mu$ M) | k <sub>pol</sub> (s <sup>-1</sup> ) | K <sub>d</sub> ( $\mu$ M) |
| CF <sub>2</sub>                  | 7.8              | 25.3 $\pm$ 1.0                      | 5.7 $\pm$ 1.4             | 0.76 $\pm$ 0.01                     | 380 $\pm$ 50              |
| CFCl (mix)                       | 8.4              | 15.7 $\pm$ 2.1                      | 10.0 $\pm$ 2.6            | 0.17 $\pm$ 0.01                     | 660 $\pm$ 40              |
| CFCl ( <i>R</i> )                | 8.4              |                                     |                           | 0.08 $\pm$ 0.01                     | 190 $\pm$ 40              |
| CFCl ( <i>S</i> )                | 8.4              |                                     |                           | 0.10 $\pm$ 0.01                     | 460 $\pm$ 60              |
| CCl <sub>2</sub>                 | 8.8              | 6.6 $\pm$ 0.9                       | 48.0 $\pm$ 10.6           | 0.05 $\pm$ 0.00                     | 800 $\pm$ 70              |
| O                                | 8.9              | 17.5 $\pm$ 3.1                      | 8.0 $\pm$ 1.8             | 1.34 $\pm$ 0.10                     | 200 $\pm$ 7               |
| CHF (mix)                        | 9.0              | 19.3 $\pm$ 0.4                      | 7.6 $\pm$ 2.6             | 1.34 $\pm$ 0.07                     | 1300 $\pm$ 100            |
| CHF ( <i>R</i> )                 | 9.0              |                                     |                           | 2.27 $\pm$ 0.40                     | 740 $\pm$ 140             |
| CHF ( <i>S</i> )                 | 9.0              |                                     |                           | 0.16 $\pm$ 0.01                     | 600 $\pm$ 110             |
| CBr <sub>2</sub>                 | 9.3              | 6.0 $\pm$ 0.7                       | 90 $\pm$ 30               | 0.02 $\pm$ 0.01                     | 500 $\pm$ 200             |
| CHN <sub>3</sub>                 | 9.34             |                                     |                           | 0.34 $\pm$ 0.05                     | 540 $\pm$ 90              |
| CHCl (mix)                       | 9.5              | 9.6 $\pm$ 1.9                       | 11.3 $\pm$ 2.4            | 0.22 $\pm$ 0.03                     | 630 $\pm$ 160             |
| CHCl ( <i>R</i> )                | 9.5              |                                     |                           | 0.26 $\pm$ 0.01                     | 290 $\pm$ 20              |
| CHCl ( <i>S</i> )                | 9.5              |                                     |                           | 0.051 $\pm$ 0.003                   | 540 $\pm$ 30              |
| CHBr                             | 9.9              |                                     |                           | 0.14 $\pm$ 0.02                     | 470 $\pm$ 130             |
| CFCH <sub>3</sub>                | 10.2             |                                     |                           | 0.22 $\pm$ 0.02                     | 110 $\pm$ 10              |
| CH <sub>2</sub>                  | 10.5             | 4.9 $\pm$ 0.7                       | 4.7 $\pm$ 2.0             | 0.12 $\pm$ 0.03                     | 470 $\pm$ 110             |
| CCH <sub>3</sub> N <sub>3</sub>  | 10.59            |                                     |                           | 0.042 $\pm$ 0.007                   | 3300 $\pm$ 1000           |
| CHCH <sub>3</sub>                | 11.59            | 0.29 $\pm$ 0.19                     | 2.2 $\pm$ 1.0             | 0.012 $\pm$ 0.001                   | 750 $\pm$ 180             |
| C(CH <sub>3</sub> ) <sub>2</sub> | 12.29            |                                     |                           | 0.0042 $\pm$ 0.0002                 | 1050 $\pm$ 70             |

Table S4. Effective  $pK_{a4}$  calculations.

| Enzyme            |                     | $\eta$     |                      |            |                      | $\lambda$  |                      |            |                      | $\beta$    |                      |            |                      |
|-------------------|---------------------|------------|----------------------|------------|----------------------|------------|----------------------|------------|----------------------|------------|----------------------|------------|----------------------|
| Pairing           |                     | A opp. T   |                      |            |                      | A opp. T   |                      | G opp. T   |                      | A opp. T   |                      | G opp. T   |                      |
| Sequence          |                     | B          |                      | W          |                      | B          |                      | B          |                      | B          |                      | B          |                      |
| Compound          | $pK_{a4}$<br>(soln) | $pK_{eff}$ | $\Delta pK_{a4,eff}$ |
| CF <sub>2</sub>   | 7.8                 | 9.0        | 1.2                  | 9.0        | 1.2                  | 8.4        | 0.6                  | 8.5        | 0.7                  | 8.7        | 0.9                  | 8.6        | 0.8                  |
| CFCl              | 8.4                 | 9.6        | 1.2                  | 9.8        | 1.4                  | 8.9        | 0.5                  | 9.0        | 0.6                  | 8.9        | 0.5                  | 9.3        | 0.9                  |
| CCl <sub>2</sub>  | 8.8                 | 9.9        | 1.1                  |            |                      | 9.4        | 0.6                  | 10.1       | 1.3                  | 9.3        | 0.5                  | 9.9        | 1.1                  |
| O                 | 8.9                 | 7.3        | -1.6                 | 7.2        | -1.7                 | 8.9        | 0.0                  | 8.7        | -0.2                 | 8.9        | 0.0                  | 8.3        | -0.6                 |
| CHF               | 9.0                 | 8.7        | -0.3                 | 8.7        | -0.3                 | 8.5        | -0.5                 | 8.5        | -0.5                 | 8.8        | -0.2                 | 8.3        | -0.7                 |
| R-CHF             | 9.0                 | 8.6        | -0.4                 | 8.3        | -0.7                 | 8.5        | -0.5                 | 8.5        | -0.5                 |            |                      | 8.0        | -1.0                 |
| S-CHF             | 9.0                 | 9.6        | 0.6                  | 9.2        | 0.2                  | 9.0        | 0.0                  | 9.1        | 0.1                  |            |                      | 9.3        | 0.3                  |
| CBr <sub>2</sub>  | 9.3                 | 9.8        | 0.5                  | 9.9        | 0.6                  | 9.8        | 0.5                  |            |                      | 9.4        | 0.1                  | 10.4       | 1.1                  |
| CHCl              | 9.5                 | 9.6        | 0.1                  | 9.7        | 0.2                  | 8.9        | -0.6                 | 8.8        | -0.7                 | 9.2        | -0.3                 | 9.2        | -0.3                 |
| R-CHCl            | 9.5                 | 9.6        | 0.1                  | 9.6        | 0.1                  |            |                      |            |                      |            |                      | 9.1        | -0.4                 |
| S-CHCl            | 9.5                 | 10.0       | 0.5                  | 9.9        | 0.4                  |            |                      |            |                      |            |                      | 9.9        | 0.4                  |
| NH                | 9.7                 | 8.6        | -1.1                 | 8.5        | -1.2                 |            |                      |            |                      |            |                      |            |                      |
| CHBr              | 9.9                 |            |                      |            |                      |            |                      |            |                      |            |                      | 9.4        | -0.5                 |
| CH <sub>2</sub>   | 10.5                | 9.1        | -1.4                 | 9.0        | -1.5                 | 9.8        | -0.7                 | 9.6        | -0.9                 | 9.5        | -1.0                 | 9.5        | -1.0                 |
| CHCH <sub>3</sub> | 11.59               | 11.1       | -0.5                 | 10.9       | -0.7                 |            |                      |            |                      | 11.1       | -0.5                 | 10.6       | -1.0                 |

## Potentiometric Calculations

The experimental data points were analyzed using the PSEQUAD (v.5.02) computer program (L. Zekany, I. Nagypal, in: D. Leggett (Ed.), Computational Methods for the Determination of Stability Constants, Plenum Press, New York, 1985, pp. 291-355). The protonation reactions of the ligands measured in this work are shown in eq. (1)-(2). The reaction for the calculation of the formation in this work for the  $\text{MgL}^{2-}$  complex are shown in eq 3, and the reaction for calculating the corresponding pKa value for  $\text{HMgL}^-$  is defined in eq. 4.

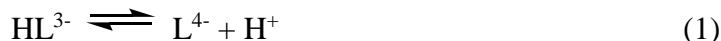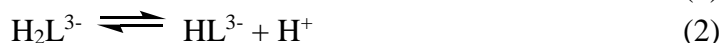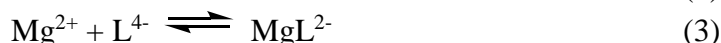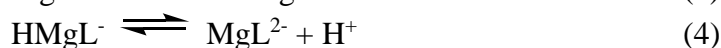

Formation constants  $\beta_{\text{pqr}}$  eq. (5) in this work are reported as the reaction eq. (6) equilibrium constants

$$\beta_{\text{pqr}} = [\text{MpLqHr}^{2p+r-4q}][\text{M}^{2+}]^{-p}[\text{L}^{4-}]^{-q}[\text{H}^+]^{-r}. \quad (5)$$

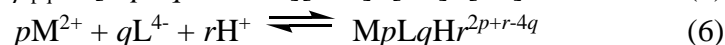

**Table S5.** Comparison of the negative logarithms of acidity constants [Eqs. (1-2)] as determined by potentiometric titration in aqueous solution (at 25°C, and  $I=0.4$  M KCl) for bisphosphonates ( $\text{O}_3\text{P-X-PO}_3$ )<sup>4-</sup>.  $\text{Mg}^{2+}$  complex formation constants (eq 3) with bisphosphonates, and the pK<sub>a</sub>'s values for the deprotonation reaction (eq 4).

| Bridging group<br>X | pK <sub>a1</sub> | pK <sub>a2</sub> | logK(MgL) | pK <sub>a</sub> (HMgL) |
|---------------------|------------------|------------------|-----------|------------------------|
| CF <sub>2</sub>     | 7.8              | 5.7              | 5.1       | 5.8                    |
| O                   | 8.6              | 6.1              | 5.7       | 6.3                    |
| CH <sub>2</sub>     | 9.9              | 6.7              | 5.4       | 7.3                    |
| NH                  | 10.9             | 7.5              | 4.9       | 9.5                    |
